# Supplementary material
Source: MDPI journal article supplement (https://www.mdpi.com/1999-4907/5/7/1532)
Supplement: s1 [file s1]

## Sheet: WORKSHEET NOTES
Worksheet notes: VOTE COUNT SUMMARIES M-A
· Column A contains the major econometric drivers (i.e., Market Drivers), categories (i.e, Timber Rents), independent variable groups (i.e., SoilExpectation Value, Sawtimber, All ($/acre). On the row with category name are the number of models by model type (F2D, F2A, U2D, F2NF) used in that category. At the bottom of each category there is a category summary row.
· Columns Z, AA, AB, AC contain numeric references to the studies that used variables in the independent variable group in that row. Columns are listed by model F2D, F2A, U2D, and F2NF respectively. The numeric references are associated with the Column A of the “ASSOCIATED STUDIES” worksheet.
· Columns B, G, L, Q are the vote-counts by model type for statistically significant variable coefficients that had a positive relationship with forestland loss. This vote-count is made for all independent variables in the group. Column V is the sum of columns B, G, L, Q. Please note – in studies where two model types were accepted, vote count doubling may occur for a some S/T ratios in column V.
· Columns C, H, M, R are the vote-counts by model type for statistically significant variable coefficients that had a negative relationship with forestland loss. This vote-count is made for all independent variables in the group. Column W is the sum of columns C, H, M, R. Please note – in studies where two model types were accepted, vote count doubling may occur for a some S/T ratios in column W.
· Columns D, I, N, S are the vote-counts by model type for not-significant variable coefficients with forestland loss. This vote-count is made for all independent variables in the group. Column X is the sum of columns. Please note – in studies where two model types were accepted, vote count doubling may occur for a some S/T ratios in column X.
· Columns E, J, O, T are the ratio of significant variable coefficient vote counts with total number of time the variable was used. This Sign to Total ratio is performed for all model types. For example, the S/T = 3/8 for cell E5 represents that 8 times a variable from the independent variable group Soil Expectation Value, Sawtimber, All was used. Out of those 8 times statistical significance at …
· Columns F,K,P,U are the ratio of significant variable coefficient vote counts that met study authors expectations with the total number of times an expectation was expressed for that variable group. This Exp. To Total ratio is performed for all model types. For example, the Exp. To Total = 2/3 for cell F5 represents that 3 times a variable from the independent variable group Soil Expectation Va…
Worksheet notes: ASSOCIATED STUDIES
Column A reference numbers correspond to the four model types in columns Z, AA, AB, AC in the VOTE COUNT SUMMARIES M-A worksheet. These are listed according to independent variable groups (rows).
Worksheet notes: F2D, F2A, U2D, AND F2 NF VOTE COUNT OBS WORKSHEETS
These contain the raw vote counts by study and independent variable group. In the worksheet, 1 = significant positive relationship with forest loss, -1 = significant negative relationship with forest loss, 0 = no significant relationship with forest loss

## Sheet: VOTE COUNT SUMMARIES M-A
Meta-analysis data from Jeuck et al, 2014.																									Column a contains the major econometric drivers
Market Drivers	F2D Models					F2A Models					U2D Models					F2NF Models					All Models
	+	-	ns	Sign. to Total	Exp. to Total	+	-	ns	Sign. to Total	Exp. to Total	+	-	ns	Sign. to Total	Exp. to Total	+	-	ns	Sign. to Total	Exp. to Total	+	-	ns	Sign. to Total	Reference numbers for studies in the Associated Studies Worksheet
Timber Rents	(models=16)					(models=14)					(models=1)					(models=11)					(models=36)				F2D	F2A	U2D	F2NF
Soil Expectation Value, Sawtimber, All ($/acre)	0	3	5	3/8	2/3	0	8	2	8/10	8/8						1	2	1	3/4	2/4	1	13	8	14/22	18,19,20,21,22,23,12,25	18,19,20,21,22,23,37,25,26,6		34,37,35
Soil Expectation Value, Pulpwood All ($/acre)	0	1	0	1/1	1/1	0	1	0	1/1	1/1											0	2	0	2/2	19	19
Timber Products Income ($/county)	0	2	0	2/2	2/2	0	3	0	3/3	3/3						0	1	2	1/3		0	6	2	6/8	21,26	1,21,26		28,32
Stumpage Value Sawtimber, All ($/MBF)	0	5	0	5/5	4/4											0	1	0	1/1	1/1	0	6	0	6/6	9,14,12,15,17			33
Forestry : Crop Income Rent (ratio)																1	0	2	1/3	1/2	1	0	2	1/3				29,28
Pulpwood Stumpage Price, Softwood ($/unit) $/cu ft)																1	0	0	1/1		1	0	0	1/1				30
Sawtimber Stumpage Price Softwoods ($/MBF)	0	1	0	1/1	1/1	0	1	0	1/1	1/1	0	0	1	0/1		0	1	1	1/2	1/1	0	3	2	3/5	13	8	46	30,31
Stumpage Value Sawtimber, Oak ($/MBF)	0	0	1	0/1	0/1																0	0	1	0/1	13
Category Summary				12/18					13/15					0/1					8/14					33/48
Timber Costs / Uncertainty	(models=0)					(models=1)					(models=0)					(models=2)					(models=3)
Timber Site Prep / Planting Costs ($/acre)																1	0	1	1/2	1/1	1	0	1	1/2				30,31
Trend in timber returns (returns trend line)						0	0	1	0/1												0	0	1	0/1		6
Uncertainty of Timber Revenue (derived)						1	0	0	1/1	1/1											1	0	0	1/1		6
Category Summary				0/0					1/2										1/2					2/4
Agriculture Rents	(models=12)					(models=17)					(models=3)					(models=4)					(models=34)
County Level Farm Rent (SEV or Profit) ($/acre)	1	0	1	1/2	0/1	7	0	0	7/7	7/7						2	0	0	2/2	1/1	10	0	1	10/11	18,22	18,20,22,37,25		37,35
County Farm Prod. Rev., $ Total or Net/area)	2	0	11	2/13	4/4	7	0	2	7/9	7/9	0	2	1	2/3		1	0	1	1/2	2/2	10	2	15	12/27	19,20,9,23,14,13,12,15,25,26,17	19,1,2,21,23,3,4,26,6	38,42,46	30,34
Farm Income to State Per Capita Income (ratio)						1	0	0	1/1	1/1											1	0	0	1/1		8
Proportion of sales from high-value crops (ratio)						1	0	0	1/1	1/1											1	0	0	1/1		4
Category Summary				3/15					16/18					2/3					3/4					24/40
Agricultural Costs / Uncertainty	(models=0)					(models=5)					(models=1)					(models=1)					(models=7)
County (or Parcel) Crop Costs ($/acre)						0	2	1	2/3	2/3						0	0	1	0/1		0	2	2	2/4		1,3,4		30
Conservation Practices Used on Plot (binary)						1	0	0	1/1	1/1											1	0	0	1/1		6
Conversion Costs Forest to Agriculture ($)						0	2	0	2/2	2/2											0	2	0	2/2		1,26
Property Taxes ($)						0	1	0	1/1	1/1											0	1	0	1/1		26
Trend in Agriculture Revenue (% change)						0	0	1	0/1												0	0	1	0/1		6
Irrigation (binary)						1	0	0	1/1	1/1											1	0	0	1/1		6
Uncertainty of Agriculture Revenue (derived )						1	0	0	1/1	1/1	0	1	0	1/1	1/1						1	1	0	2/2		6	42
Category Summary				0/0					8/10					1/1					0/1					9/12
Urban Rents	(models=6)					(models=0)					(models=2)					(models=2)					(models=9)
Residential Land Value ($/acre)											1	0	0	1/1	1/1						1	0	0	1/1			40
Profit from Recently Dev. Land ($/county)	6	0	0	6/6	6/6						1	0	0	1/1	1/1	2	0	0	2/2		9	0	0	9/9	21,14,13,15,26,17		42	31,32
Category Summary				6/6										2/2					2/2					10/10
Urban Costs / Uncertainty	(models=1)					(models=0)					(models=3)					(models=1)					(models = 5)
Value of Farmland ($)											0	2	0	2/2	2/2	0	0	1	0/1		0	2	1	2/3			40,43	31
Conversion Cost Forest to Urban ($)	0	1	0	1/1	1/1						0	1	0	1/1	1/1						0	2	0	2/2	26		40
Property Taxes ($)	0	1	0	1/1	1/1																0	1	0	1/1	26
Sewer nearby (binary)											1	0	0	1/1	1/1						1	0	0	1/1			40
Variance of new housing value (derived)											0	1	0	1/1	1/1						0	1	0	1/1			42
Category Summary				2/2					0/0					5/5					0/1					7/8
Government Policy	F2D Models					F2A Models					U2D Models					F2NF Models					All Models
	+	-	ns	Sign. to Total	Exp. to Total	+	-	ns	Sign. to Total	Exp. to Total	+	-	ns	Sign. to Total	Exp. to Total	+	-	ns	Sign. to Total	Exp. to Total	+	-	ns	Sign. to Total	Reference numbers for studies in the Associated Studies Worksheet
Forestry Incentive Programs	(models=1)					(models=8)					(models=0)					(models=2)					(models=9)				F2D	F2A	U2D	F2NF
County Tree Planting and Cons. Expenses ($)						0	2	1	2/3	2/2						0	2	0	2/2		0	4	1	4/5		2,3,8		28
County Tree Planting Programs (acres)	0	0	1	0/1		0	1	0	1/1	1/1											0	1	1	1/2	12	2
Rental Rate for Ag. Reduction Prog. ($/acre)						0	2	0	2/2	2/2											0	2	0	2/2		3,4
County WRP Restoration Costs ($/acre)						1	0	0	1/1	1/1											1	0	0	1/1		3
County Land in Acreage Adjustment Programs, Other Than WRP (%)						0	0	1	0/1	0/1											0	0	1	0/1		3
County Idle Crop Land (%)						0	2	0	2/2	1/1											0	2	0	2/2		3,4
Parcel (Plot) Has CRP Eligibility (binary)						0	2	0	2/2	2/2											0	2	0	2/2		1,6
Impact of Flood Control Program on Farming Feasibility (index)						0	2	0	2/2	2/2											0	2	0	2/2		7
Flood Control Programs Impact on Land Quality Heterogeneity (mean)						1	0	0	1/1	1/1											1	0	0	1/1		7
Pre-WRP Easement Property Tax (binary)						1	0	0	1/1	1/1											1	0	0	1/1		4
Hydric Cropland Eligible for WRP (state acres)						0	1	0	1/1	1/1											0	1	0	1/1		4
Category Summary				0/1					15/17										2/2					17/20
Zoning Effects on Forestland Loss	(models=2)					(models=0)					(models=5)					(models=0)					(models =7)
County Has / Plot in Forest Use Zone Law (binary)											0	2	0	2/2	1/1						0	2	0				42,46
County Has or Plot in Agriculture Use Zone Law (binary)											0	2	0	2/2							0	2	0	2/2			42,46
Parcel in Critical Habitat Zone (binary)											0	1	0	1/1							0	1	0	1/1			45
Plot in Urban Growth Zone (binary)											1	0	0	1/1	1/1						1	0	0	1/1			46
Interaction Land Use Law Enacted X Urban Growth Zone (binary)											1	0	0	1/1	1/1						1	0	0	1/1			46
Mandetory Review on Farmland Dev. (binary)											0	1	0	1/1							0	1	0	1/1			42
County Has Comprehensive Plan (binary)											0	1	0	1/1	1/1						0	1	0	1/1			42
Parcel in 3+ Acre Minimum Zoning (binary)	0	2	0	2/2	2/2						0	2	0	2/2							0	4	0	4/4	14,17		41,45
Proportion of County in County Rural Zoning (%)											0	0	1	0/1							0	0	1	0/1			44
Proportion of County Rural Zoning Enacted in Neighboring Counties (%)											0	0	1	0/1	0/1						0	0	1	0/1			44
Proportion of County in Township Rural Zoning (%)											1	0	0	1/1	1/1						1	0	0	1/1			44
Proportion of Township Rural Zoning Enacted in Neighboring Counties (%)											1	0	0	1/1	1/1						1	0	0	1/1			44
Category Summary				2/2					0/0					13/15					0/0					15/17
Site Characteristics	F2D Models					F2A Models					U2D Models					F2NF Models					All Models
	+	-	ns	Sign. to Total	Exp. to Total	+	-	ns	Sign. to Total	Exp. to Total	+	-	ns	Sign. to Total	Exp. to Total	+	-	ns	Sign. to Total	Exp. to Total	+	-	ns	Sign. to Total	Reference numbers for studies in the Associated Studies Worksheet
Land Quality / Productivity	(models=19)					(models=17)					(models=8)					(models=9)					(models=48)				F2D	F2A	U2D	F2NF
Average Site Productivity Rating For County (inversed LCC, MLRA Class, or Site Index)	0	3	10	3/13	2/2	11	0	0	11/11	7/7	1	1	0	2/2	1/1	2	0	2	2/4	1/1	14	4	12	18/30	18,19,20,9,22,23,24,14,13,12,25	18,19,20,22,23,24,37,25,6	42,43	35,36
Variance in Average County LCC (derived estimate)						0	1	0	1/1	1/1						1	0	0	1/1	1/1	1	1	0	2/2		37		37
Highly Productive Soils - LCC I,II; MRLC Class 1,2 (% of area or binary)	4	4	6	8/14	5/6	4	3	5	7/12	6/7	0	4	1	4/5		2	2	2	4/6	2/3	10	13	14	23/37	18,19,20,9,21,22,23,14,12,15,25,17	18,19,20,1,2,21,22,23,3,25	41,43,44,45,47	30,31,32,33,37,35
Moderately Productive Soils - LCC III,IV (% of county, acreage, plot, or binary)	1	0	0	1/1	1/1	0	2	0	2/2	2/2						1	1	0	2/2	1/1	2	3	0	5/5	21	21,4		32,35
Loss of Highly Productive Acreage During Study Period (%)											1	0	0	1/1							1	0	0	1/1			43
Land Quality Fragmentation Index (continuous, low value = low fragmentation, high value = high fragmentation )											1	0	0	1/1	1/1						1	0	0	1/1			39
Poor Soil for Development (binary)											0	2	0	2/2	1/1						0	2	0	2/2			40,45
FIA Plot or Raster Slope (%)	0	4	0	4/4	1/1	0	2	0	2/2		0	2	1	2/3	2/2	0	2	1	2/3	1/1	0	10	2	10/12	11,24,27,16	24,27	39,40,47	33,34,36
Elevation (meter)	0	1	1	1/2	1/1																0	1	1	1/2	11,16
Category Summary				17/34					23/28					12/14					11/16					63/92
Forestland Proximity Influences	(models=3)					(models=3)					(models=2)					(models=1)					(models=9)
Location Is Softwood Forest (binary)	1	0	0	1/1		0	0	1	0/1												1	0	1	1/2	24	24
Location Is Hardwood Forest (binary)	0	0	1	0/1		0	0	1	0/1												0	0	2	0/2	24	24
Contiguous Forest Area in Parcel or Around Plot (acres)	0	2	0	2/2		0	1	0	1/1							0	1	0	1/1	1/1	0	4	0	4/4	10,24	24		33
Forested Land In County (acres)						0	1	0	1/1	1/1											0	1	0	1/1		8
Public Ownership (binary or percent by area)	0	0	1	0/1		0	0	1	0/1		0	0	1	0/1	0/1						0	0	3	0/3	24	24	39
Location Is Industry Ownership (binary)	0	0	1	0/1		0	0	1	0/1												0	0	2	0/2	24	24
Location Is NIPF Ownership (binary)	1	0	0	1/1		0	0	1	0/1												1	0	1	1/2	24	24
Location Is Conservation Ownership (binary)	0	1	0	1/1		0	1	0	1/1												0	2	0	2/2	27	27
Location Is Misc. Ownership (binary)											1	0	0	1/1							1	0	0	1/1			46
Category Summary				5/8					3/8					1/2					1/1					10/19
Agriculture Proximity Influences	(models=0)					(models=3)					(models=2)					(models=0)					(models=5)
Location Is Farmer Owned (binary)											0	0	1	0/1							0	0	1	0/1			46
Agricultural Land in County (% or acres)						2	0	0	2/2		1	0	0	1/1							3	0	0	3/3		2,8	39
Pasture in County (% or acres)						2	0	0	2/2												2	0	0	2/2		6,8
Category Summary				0/0					4/4					1/2					0/0					5/6
Development Proximity Influences	(models=14)					(models=7)					(models=8)					(models=2)					(models=31)
Proximity To Roads / Highway or County Highway Density (binary, distance or per area)	0	5	1	5/6	3/3	0	1	1	1/2	1/1	0	3	0	3/3	3/3						0	9	2	9/11	10,24,25,27,16,17	24,25	39,44,47
Proximity /Access to Urban Areas (distance)	1	4	2	5/7	3/3	0	2	2	2/4	1/1	0	5	1	5/6	1/2	0	0	1	0/1		1	11	6	12/18	19,20,9,10,22,24,16	19,20,22,24	39,41,42,43,45,47	37
Proximity to Developed Sites (distance)	0	1	0	1/1		0	0	1	0/1		1	2	0	3/3	2/2						1	3	1	4/5	24,16	24	41,45,47
Proximity to Industrial Complex (distance)											1	0	0	1/1	1/1						1	0	0	1/1			47
County Urban Area at Start of Study (acres)											1	0	0	1/1							1	0	0	1/1			43
Plot or County Area Converted to Urban Over Study Period (binary or area)											2	0	0	2/2	1/1						2	0	0	2/2			38,43
Vacant Land Near Parcel (binary)											0	1	1	1/2							0	1	1	1/2			45,47
County has (is part of) Metropolitan Statistical Area (binary)	1	0	2	1/3	1/3						1	0	1	1/2	1/2						2	0	3	2/5	14,15,17		43,44
Rural-Urban Continuity Codes (ordinal 1 = urban, 9 = rural)	0	3	0	3/3	3/3																0	3	0	3/3	14,13,15
Urban Influence or Population Gravity Index (binary or PGI)	2	0	0	2/2	2/2	1	0	0	1/1		0	1	0	1/1	1/1	1	0	0	1/1		4	1	0	5/5	11,27	27	47	32
Change in Population Gravity Index (change amount)	1	0	0	1/1	1/1																1	0	0	1/1	27
Population Interaction Zones for Agriculture (PIZA) - Low Interaction (binary)						0	1	0	1/1	1/1											0	1	0	1/1		2
Population Interaction Zones for Agriculture (PIZA), High Interaction (binary)						1	0	0	1/1	1/1											1	0	0	1/1		2
Category Summary				18/23					6/10					18/21					1/2					43/56
Socioeconomic Characteristics	F2D Models					F2A Models					U2D Models					F2NF Models					All Models
	+	-	ns	Sign. to Total	Exp. to Total	+	-	ns	Sign. to Total	Exp. to Total	+	-	ns	Sign. to Total	Exp. to Total	+	-	ns	Sign. to Total	Exp. to Total	+	-	ns	Sign. to Total	Reference numbers for studies in the Associated Studies Worksheet
Population and Growth	(models=17)					(models=10)					(models=7)					(models=11)					(models=39)				F2D	F2A	U2D	F2NF
County Population (people)											0	1	0	1/1													43
County Population Density (people / area unit or county)	14	0	1	14/15	9/10	2	1	7	3/10	2/3	4	0	0	4/4	2/2	6	1	0	7/7	2/2	26	2	8	28/36	18,19,20,9,10,11,22,23,24,14,13,12,25	18,19,20,22,23,24,25,6	38,39,41,44	30,31,33,34,35,36
Change in County Population or Density (%)	1	0	0	1/1							3	0	0	3/3	1/1	1	0	0	1/1	1/1	5	0	0	5/5	11		43,46,47	33
Census Block Population Growth Rate (%)	0	0	1	0/1		0	0	1	0/1												0	0	2	0/2	24	24
Change in Nearest Urban (or MSA) Pop. (%)																1	0	0	1/1	1/1	1	0	0	1/1				37
County Pop. / Forest acres (people/unit area)	2	0	0	2/2	2/2																2	0	0	2/2	15,17
Urban Population (people)																3	0	0	3/3	1/1	3	0	0	3/3				29,28
Rural Population (people)																0	0	3	0/3		0	0	3	0/3				29,28
Category Summary				17/19					3/11					8/8					12/15					39/52
Income	(models=6)					(models=1)					(models=6)					(models=5)					(models=18)
County Average Salary, Per Capita Inc, Median HH Income ($)	4	0	1	4/5	3/3						3	1	0	4/4	1/1	5	0	0	5/5		12	1	1	13/14	14,13,12,15,17		38,39,42,43	29,28,30,31,37
Census Tract Median Household Income ($)	0	0	1	0/1		0	0	1	0/1												0	0	2	0/2	24	24
County (or State) Change in Median Household Income (%)											0	0	1	0/1							0	0	1	0/1			46
Poverty (%)	0	1	1	1/2																	0	1	1	1/2	14,15
Inflation Rate (%)																0	0	1	0/1		0	0	1	0/1				29
Change in employment (city level) (%)											1	0	0	1/1							1	0	0	1/1			47	0
Category Summary				5/8					0/1					5/6					5/6					15/21
Other Socioeconomic	(models=4)					(models=2)					(models=0)					(models=1)					(models=7)
Landowner Age (years)						0	1	0	1/1	1/1						0	0	1	0/1		0	1	1	1/2		3		30
BS Degree or Higher (%)	1	2	0	3/3		0	0	1	0/1												1	2	1	3/4	24,13,15	24
HS Degree (%)	1	0	0	1/1	1/1																1	0	0	1/1	14
Category Summary				4/4					1/2										0/1					5/7

## Sheet: ASSOCIATED STUDIES
Meta-analysis reference number	Model type included	Authors	Dependent variable estimator (LHS)	Model specification	Model Unit	Model Change	Region	Authors	Year	Title	Publication
36	F2NF	Wear et al. 1999	probability of transitioning from commercial forestry	binomial logit	FIA Plots	FIA plot change	Virginia	Wear, David N.; Liu, , Rei; Foreman, Michael; Sheffield, Raymond	1999	The effects of population growth on timber management and inventories in Virginia	Forest Ecol and Mngmt 118: 107-115
16	F2D	Wear & Bolstad 1999 (LC)	probability forested pixel developed	binomial logit	Raster cell	Raster cell change	Cane Creek, Henderson County, NC	Wear, David N.; Bolstad, Paul	1999	Land Use Changes in Southern Appalachian Landscapes: Spatial Analysis and Forecast Evaluation	Ecosystems, 1: 575-594.
7	FA2	Stavins & Jaffe 1990	forested acres from crop land abandonment	nonlinear LS, fixed effects	County	Area change	Mississippi Delta	Stavins, Robert N.; Adam B. Jaffe	1990	Unintended Impacts of Public Investments on Private Decisions: The Depletion of Forested Wetlands	American Economic Review, 80(3): 337-352.
8	FA2	White & Flemming 1980	forest acres Vs. crop acres	OLS (3-stage)	County	Share change	Georgia	White, F.C.; F.N. Fleming	1980	An Analysis of Competing Agricultural Land Uses	Southern Journal of Agricultural Economics, 12(2): 99-103.
12	F2D	Nagubadi & Zhang 2005	ln(timberland share /urban and other share)	(MML) multiplicative heteroskedastic regression	County	Share change	Alabama and Georgia	Nagubadi, Rao V.; Zhang, Daowei	2005	Determinants of timberland use by ownership and forest type in Alabama and Georgia	Journal of Agricultural and Applied Economics, 37(1): 173-186.
13	F2D	Nagubadi & Zhang 2007	ln (SW forest share /urban and other share)	(MML) multiplicative heteroskedastic regression	County	Share change	Southeastern States	Nagubadi, Rao V.; Zhang, Daowei	2007	Ubanization and timberland-use change in the southern US. In Cross-sectoral policy developments in foresrty, edited by Yves C. Dubé and Franz Schmithüsen.	FAO Pub. pp. 212-224. Found at: http://bookshop.cabi.org/Uploads/Books/PDF/9781845932503/9781845932503.pdf Last accessed: 12/30/2011.
14	F2D	Nagubadi & Zhang 2009	ln(NIPF share /urban and other share)	(MML) multiplicative heteroskedastic regression	County	Share change	Alabama, Georgia	Nagubadi, Rao V.; Zhang, Daowei	2009	Timberland ownership in the southern United States: urbanization and socio-economic factors.	Proceedings of the 2008 Southern Forest Economics Workers Annual Meeting; 2008 Mar 9-11; Savannah, GA. pp. 10-17. Found at: http://sofew.cfr.msstate.edu/papers/2008_proceedings.pdf#page=22 Last accessed: March 2014.
15	F2D	Nagubadi & Zhang 2010	ln(timberland forest share/urban share)	(MML) multiplicative heteroskedastic regression	County	Share change	Georgia	Nagubadi, Rao V.; Zhang, Daowei	2010	Urbanization Effects on Timberland by Ownership Class: A Modified Multinomial Logit Analysis	Southern Journal of Applied Forestry 34(3): 101-109
17	F2D	Zhang & Nagubadi 2005	ln(timberland share / urban and other share)	(MML) multiplicative heteroskedastic regression	County	Share change	Southeast US	Zhang, Daowei; Nagubadi, Rao V.	2005	The influence of urbanization on timberland use by forest type in the Southern United States	Forest Policy and Economics 7: 721– 731
22	F2D, F2A	Mauldin et al. 1999a	ln (urban share /forest share) ln (farm share /forest share)	(MML) OLS	County	Share change	Maine	Mauldin, Thomas E., Plantinga, Andrew J.; Alig, Ralph	1999a	Determinants of Land Use in Maine with Projections to 2050	Northern Journal of Applied Forestry, 16(2): 82-88
23	F2D, F2A	Mauldin et al. 1999b	ln (urban share /forest share) (farm shares / forest shares)	(MML) OLS	County	Share change	Wisconsin	Mauldin, Thomas E., Plantinga, Andrew J.; Alig, Ralph	1999b	Land Use in the Lake States Region: An Analysis of Past Trends and Projections of Future Changes	Res. Pap. PNW-RP-519. Portland, OR: U.S. Department of Agriculture, Forest Service, Pacific Northwest Research Station. 32 p.
19	F2D, F2A	Ahn et al. 2001	ln(urban, other share / forest share) ln(agriculture share/ forest share)	(MML) OLS with fixed effects (FIA units dummy variables)	FIA Unit	Share change	South Central US	Ahn, SoEun, Plantinga,Andrew J.; Alig, Ralph J.	2001	Historical Trends and Projections of Land Use for the South-Central United States.	USDA Forest Service, Pacific Northwest Research Station. Research Paper PNW-RP-530. 21 p.
9	F2D	Ahn et al. 2002b	ln(urban, other share / forest share)	(MML) OLS with fixed effects (state units dummy variables)	County	Share change	South Central US	Ahn, SoEun; Robert C. Abt; Andrew J. Plantinga	2002b	Land Use in the South Central United States: A Further Investigation on Land Use Practices by Forestland Ownership	Proceedings of the Southern Forest Economics Workshop 2002 Virginia Beach, Virginia March 17-19, 2002. Found at: http://sofew.cfr.msstate.edu/papers/0243ahn.pdf. Last accessed: 1/2/2012.
20	F2D, F2A	Ahn et al. 2002a	ln(urban, other share / forest share) ln(agriculture share/ forest share)	(MML) OLS with fixed effects (state units dummy variables)	County	Share change	South Central US	Ahn, SoEun, Plantinga,Andrew J.; Alig, Ralph J.	2002a	Determinants and Projections of Land Use in the South Central United States	Southern Journal of Applied Forestry 26(2): 78-84
25	F2D, F2A	Plantinga & Mauldin 2001	ln(urban share/forest share) ln(farm share /forest share)	(MML) OLS with fixed effects (year dummy variables)	County	Share change	Maine, South Carolina, Wisconsin	Plantinga, Andrew J.; Mauldin, Thomas	2001	A Method for Estimating the Cost of C02 Mitigation Through Afforestation	Climatic Change, 49: 21-40.
18	F2D, F2A	Ahn et al. 2000	ln(urban, other share / forest share) ln(agriculture share/ forest share)	(MML**) OLS with fixed effects (FIA units dummy variables)	County	Share change	Alabama	Ahn, SoEun, Plantinga,Andrew J.; Alig, Ralph J.	2000	Predicting Future Forest Land Area: A Comparison of Econometric Approaches.	Forest Science, 46(3):363-376.
43	U2D	Hsieh et al. 2000	acres all land use converted to urban	2-Stage OLS with IV	County	Share change	Midwest US	Hsieh, Wen-hua; Irwin, Elena G.; Forster, Lynn	2000	Spatial Dependence among County Level Land Use Changes	No 21852, American Agricultural Economics Association 2000 Annual Meeting, July 30-August 2, Tampa, FL, (New Name 2008: Agricultural and Applied Economics Association) 27 p. Found at: http://ageconsearch.umn.edu/bitstream/21852/1/sp00hs01.pdf. Last accessed: March 2014.
10	F2D	Hodges et al. 1998 (LC)	binary change forest to urban	binomial logit	Parcel	Raster cell change	Regional - St. Tammany Parish, LA	Hodges, Donald G.; Gunter, James T.; Swalm, Christopher M.; Regens, James L.	1998	Utilizing GIS to Assess the Impact of Urbanization on Timberland Availability in Southeastern Louisiana	Proceedings of the 2nd Southern Forestry GIS Conference, Oct. 28-29, 1998, Athens GA, 1998
6	FA2	Schatzki 2003	probability of NRI crop plot to forest conversion	binomial probit	NRI Plots	NRI Plot change	Georgia	Schatzki, S. Todd	2003	Options, uncertainty and sunk costs: an empirical analysis of land use change	J of Env econ and mgmnt 46(1): 86-105
40	U2D	Bockstael 1996	binary - undeveloped Vs. developed	binomial probit	Parcel	Area change	Patuxent Watershed, Maryland	Bockstael, Nancy E.	1996	Modeling Economics and Ecology: The Importance of a Spatial Perspective.	American Journal of Agricultural Economics, 78 (5): 168-1 180.
45	U2D	Irwin & Bockstael 2002	binary: undeveloped Parcel gets developed	binomial probit (hazard)	Parcel	Area change	Central Maryland	Irwin, Elena G.; Bockstael, Nancy E.	2002	Interacting Agents, Spatial Externalities, and the Endogenous Evolution of Residential Land Use Pattern	Journal of Economic Geography, 2(1): 31-54.
46	U2D	Kline & Alig 1999	probability FIA forest plot is converted	binomial probit (random effects)	FIA Plots	FIA plot change	Oregon, Washington State	Kline, Jeffrey D.; Alig, Ralph J.	1999	Does Land Use Planning Slow the Conversion of Forest and Farm Lands?	Growth and Change, 30: 3-22.
44	U2D	Irwin et al. 2002	ln(undeveloped share /developed share)	binomial probit (weighted neighborhood function)	County	Share change	Ohio	Irwin, Elena G.; Hsieh, Wen-hua; Libby, Lawrence W.	2002	The Effect of Rural Zoning on the Spatial Allocation of Urban Land	Selected paper presented at the 2001 American Agricultural Economics Association Meeting, Chicago, IL, USA, August 3-7, 2001 24 p.
41	U2D	Carrion & Irwin 2004	probability of undeveloped to residential	binomial probit with spatial weights matrix	Parcel	Binary conversion	Medina County, Ohio	Carrion, Irwin	2004	Using a Spatial Economic Model of Land Use Conversion to Explain Residential Sprawl at the Rural-Urban Fringe	American Journal of Agricultural Economics, 86(4): 889-904
32	F2NF	Lewis & Plantinga 2007	probability of transitioning out of NRI forest plot	conditional logit	NRI plots	NRI plot change	South Carolina Coastal Plain	Lewis, David A.; Plantinga, Andrew J.	2007	Policies for Habitat Fragmentation: Combining Econometrics with GIS-Based Landscape Simulations	Land Economics, May 2007 83(2): 109-127
1	FA2	Claassen 1993	probability of farmland conversion to forest	conditional logit	Parcel	Area change	South Carolina	Claassen, Roger L.	1993	Rural Land Use ill South Carolina 1982-1987: A Discrete Choice Approach. M. S. Thesis.	University of Maryland - Masters Thesis
27	F2D, F2A	Polyakov & Zhang 2008 (LC)	probability pixel converts to development probability that pixel converts to farm	conditional logit	Raster cell	Raster cell change	Georgia Piedmont	Polyakov, Maksym; Zhang, Daowei	2008	Population growth and land-use dynamics along urban-rural gradient	Journal of Agricultural and Applied Economics, 40(2): 649-666.
34	F2NF	Parks & Murray 1994	proportion of County in forestland	grouped logit	County	Area change		Parks, J.; Murray, B.	1994	Land Attributes and Land Allocation : Nonindustrial Forest Use in the Pacific Northwest	Forest Science 40(3): 558-575
3	FA2	Parks & Kramer 1995	proportion County land enrolled in WRP	grouped logit	County	WRP area change	National - 48 contiguous states and Puerto Rico	Parks, Peter J.; Randall A. Kramer	1995	A Policy Simulation of the Wetlands Reserve Program.	Journal of Environmental Economics and Management, 28: 223-240.
4	FA2	Parks & Schorr 1997	area enrolled in CRP	grouped logit	County	CRP area change	Northeastern US	Parks, Peter J.; James P. Schorr	1997	Sustaining Open Space Benefits in the Northeast: An Evaluation of the Conservation Reserve Program	Journal of Environmental Economics and Management,32(1):85-94.
38	U2D	Alig et al. 2004	ln [P(developed)/1-P(undeveloped)	logit	County	Share change	Nationwide US	Alig, Ralph; Kline, Jeffrey D.; Lichtenstein, Mark	2004	Urbanization on the US Landscape: looking ahead into the 21st century	Landscape and Urban Planning 69(2-3): 219-234
11	F2D	Kline et al. 2009 (LC)	logit(developed from FIA forest plot)	logit	Raster cell	Raster cell change	Western Washington	Kline, D. Jeffrey; Moses, Alissa; Azuma, David; Grey; Andrew	2009	Evaluating Satellite Imagery–Based Land Use Data for Describing Forestland Development in Western Washington	West. J. Appl. For 24(4): 214-222
47	U2D	Landis & Zhang 1997 (LC)	probability of undeveloped pixel to developed	ML	Raster cell	Raster cell change	Bay Area Northern California	Landis, John; Zhang, Ming	1997	Modeling Urban Land Use Change: The Next generation of the California Urban Futures Model	University of California, Berkeley. Internet paper found at: http://www.ncgia.ucsb.edu/conf/landuse97/papers/landis_john/paper.html. Last accessed March 2014.
30	F2NF	Hardie & Parks 1997	ln[P(forest) / P(developed)]	MML	County	Share change	Southeastern US	Hardie, Ian; Parks, Peter	1997	Land Use with Heterogeneous Land Quality: An Application of an Area Base Model.	American Journal of Agricultural Economics, 79(2): 299-310
31	F2NF	Hardie et al. 2000	ln[(P(forest)/P(developed)]	MML	County	Share change	Southern US	Hardie, Ian; Parks, , Peter; Gottlieb,Peter; Wear, David	2000	Responsiveness of Rural and Urban Land Uses to Land Rent Determinants in the U.S. South.	Land Economics, 76(4): 659-673
24	F2D, F2A	Munn & Cleaves 1999	probability FIA forested plot converting to urban probability FIA forested plot converting to agricutlure	multinomial logit	FIA Plots	FIA plot change	Southern US	Munn, Ian A.; Cleaves, David	1999	An Analysis of Losses to the Southern Commercial Timberland Base	Journal Article No. FO-906. Forest and Wildlife Research Center, Mississippi State University. 7 p.
21	F2D, F2A	Lubowski 2002	probability NRI forest plot to urban transition probability of NRI forest plot to agriculture transition	nested logit	NRI plots	NRI plot change	National - 48 contiguous states	Lubowski, Reuben N.	2002	Determinants of Land-Use Transitions in the United States: Econometric Analysis of Changes Among the Major Land-Use Categories	PhD Dissertation - Harvard University
37	F2NF, A2F	Plantinga & Ahn 2002	probability of forest to non-forest transition probability of farm to forest transition	nonlinear seemingly unrelated regression equations (NLSURE)	County	Area change	South Central US	Plantinga, Andrew J.; Ahn, ; SoEun	2002	Efficient Policies for Environmental Protection: An Econometric Analysis of Incentives for Land Conversion and Retention	Journal of Agricultural and Resource Economics, 27(1):128-145
5	FA2	Poe 1998	proportion state hydric cropland enrolled in WRP	OLS	State	CRP area change	39 states with WRP	Poe, Gregory L.	1998	Propert Tax Distortions and Participation in Federal Easement Programs: An Ewxploratory Analysis of thw Wetlands Reserver Program	Ag and Res. Econ. Rev. 27: 117-124
2	FA2	Jensen 2007	log acres CRP	OLS with fixed effects	County	CRP area change	North Carolina	Jensen, Jeff	2007	Land conservation and the Conservation Reserve Program (CRP) in North Carolina	MS Thesis. North Carolina State University.
39	U2D	Alig et al. 2005 (LC)	forest fragmentation index	OLS, with land quality fragmentation	Census tracts	Share change	Western Oregon, Washington State	Alig, Ralph J.; Lewis, David J.; Swanson, Jennifer J.	2005	Is forest fragmentation driven by the spatial configuration of land quality? The case of western Oregon	Forest Ecology and Management 217 (2-3): 266-274
33	F2NF	Meng 2011	probability of transitioning out of NRI or FIA forest plot	random parameter logit	NRI plots	NRI plot change	Southern US	Meng, Li	2011	Land-use Changes, Forest Type Changes, and Related Environmental Concerns in the Southern U.S.	PhD Dissertation, Auburn University.
35	F2NF	Plantinga & Wu 2003	ln(forested share /non-forest share)	seemingly unrelated regression equation (SURE)	County	Share change	Wisconsin	Plantinga, Andrew J.; Wu, Junjie	2003	Co-Benefits from Carbon Sequestration in Forests: Evaluating Reductions in Agricultural Externalities from an Afforestation Policy in Wisconsin	Land Economics, 79(1):74-85
42	U2D	Cho et al. 2005	log (developed/ original undeveloped area)	seemingly unrelated regression equation (SURE)	County	Area change	Cascade Region California, Oregon, Washington State	Cho, S.; Wu, J.; Alig, R.	2005	Land development under regulation: comparison between the east and west sides of the cascade range in oregon, washington, and california	RURDS, 17(1): 1-17
28	F2NF	Alig et al. 1988	percent farm-forestland share - Coastal Plain	seemingly unrelated regression equation (SURE)	FIA Unit	Share change	South Central US	Alig, Ralph, J.; White,Fred C.; Murray, Brian C.	1988	Economic Factors Influencing Land Use Changes in the South-Central United States	USDA For. Ser. SEFES Res. Pap. SE-272 26 p.
29	F2NF	Alig 1986	percent farm-forestland share	seemingly unrelated regression equation (SURE)	FIA Unit	Share change	Southeastern US	Alig, Ralph J.	1986	Econometric Analysis of the Factors Influencing Forest Acreage Trends in the Southeast.	Forest Science, 32 (1), pp. 119-134.
26	F2D, F2A	Polyakov & Zhang 2007	probability of NRI forest plot to urban transition probability of NRI forest plot to farm transition	two-level nested logit	NRI plots	NRI plot change	Louisianna	Polyakov, Maksym; Zhang, Daowei	2007	Property Taxes : Do They Affect Forestry and Agricultural Land Uses ?	Proceedings of the Southern Forest Economics Workshop 2006 Emerging Issues in Forest Economics Knoxville, Tennessee March 22-24, 2006. pp. 134-142. Found at: http://sofew.cfr.msstate.edu/papers/2007_proceedings.pdf. Last accessed: March 2014.

## Sheet:  F2D VOTE COUNT OBS
Descriptive Text			Intercept	FOREST RENT									FOREST COST/UNCERTAINTY				AGRICULTURE RENTS				AGRICULTURE COSTS / UNCERTAINTY								URBAN RENTS			URBAN COSTS / UNCERTAINTY						FOREST INCENTIVE PROGRAMS											ZONING ISSUES AFFECTING FORESTLAND LOSS
Author(s)	Year	Reference number	Intercept	Number of models factor appears	Soil Expectation Value, All Sawtimber ($/acre)	Soil Expectation Value, All Pulpwood ($/acre)	Timber Products Income ($/county)	Forestry to Crop Rent (ratio)	Pulpwood Stumpage Price, Softwood ($/CD)	Sawtimber Stumpage Price Softwoods ($/MBF)	Sawtimber Stumpage Oak ($/MBF)	Sawtimber Stumpage Sawtimber, All ($/MBF)	Number of models factor appears	Timber Site Prep / Planting Costs ($/acre)	Trend in timber returns	Uncertainty of Timber Revenue (derived estimate)	Number of models factor appears	Annual County Farm Product Revenue, Total or Net ($/county or $/acre)	(SEV) ($/acre) (may	Farm Income to State Per Capita Income (ratio)	Number of models factor appears	County (or Parcel) Crop Costs ($/acre)	Conservation Practices Used on Plot (binary)	Conversion Costs Forest to Agriculture ($)	Property Taxes ($)	Trend in Agriculture Revenue (% change)	Irrigation (binary)	Uncertainty of Agriculture Revenue (derived estimate)	Number of models factor appears	Residential Land Value ($/acre)	Profit from Recently Developed Land / New Housing Units($/county)	Number of models factor appears	County Farmland Value ($/acre)	Conversion Cost Forest to Urban ($)	Property Taxes ($)	Sewer nearby (binary)	County variance of new housing value	Number of models factor appears	County Tree Planting, Other Conservation Program Expenditures ($)	County Tree Planting Programs (acres)	State has C/S Program for Forestry (binary)	County Rental Rate for WRP or CRP or Other Agriculture Reduction Programs ($/acre)	County WRP Restoration Costs ($/acre)	County Land in Acreage Adjustment Programs, Other Than WRP (%)	County Idle Crop Land (%)	Parcel (Plot) Has CRP Eligibility (binary)	Impact of Flood Control Program on Farming Feasibility (index)	Flood Control Programs Impact on Land Quality Heterogeneity (mean)	Number of models factor appears
			POS Votes	16	0	0	0	0	0	0	0	0	0	0	0	0	12	2	1	0	0	0	0	0	0	0	0	0	6	0	6	1	0	0	0	0	0	1	0	0	0	0	0	0	0	0	0	0	2
			NEG Votes		3	1	2	0	0	1	0	5		0	0	0		0	0	0		0	0	0	0	0	0	0		0	0		0	1	1	0	0		0	0	0	0	0	0	0	0	0	0
			NS Votes		5	0	0	0	0	0	1	0		0	0	0		11	1	0		0	0	0	0	0	0	0		0	0		0	0	0	0	0		0	1	0	0	0	0	0	0	0	0
Ahn, SoEun, Andrew J. Plantinga, and Ralph J. Alig	2000	18	-1	1	-1								0				1		0		0								0			0						0											0
Ahn, SoEun, Andrew J. Plantinga, and Ralph J. Alig	2001	19	-1	2	0	-1							0				1	0			0								0			0						0											0
Ahn, SoEun, Andrew J. Plantinga, and Ralph J. Alig	2002a	20	-1	1	-1								0				0	1			0								0			0						0											0
Ahn, SoEun; Robert C. Abt and Andrew J. Plantinga	2002b	9	0	1								-1	0				0	1			0								0			0						0											0
Hodges, Donald G.; James T. Gunter; Christopher M. Swalm; and James L. Regens	1998	10	-1	0									0				0				0								0			0						0											0
Kline, D. Jeffrey; Alissa Moses, David Azuma, and Andrew Grey	2009	11	-1	0									0				0				0								0			0						0											0
Lubowski, Reuben N.	2002a	21		1			-1						0				0				0								1		1	0						0											0
Mauldin, Thomas E., Andrew J. Plantinga, and Ralph Alig	1999a	22	0	1	-1								0				1		1		0								0			0						0											0
Mauldin, Thomas E., Andrew J. Plantinga, and Ralph J. Alig	1999b	23	0	1	0								0				1	0			0								0			0						0											0
Munn, Ian A. and David Cleaves	1999	24	0	0									0				0				0								0			0						0											0
Nagubadi, Rao V. and Daowei Zhang	2009	14		1								-1	0				1	0			0								1		1	0						0											1
Nagubadi, Rao V. and Daowei Zhang	2007	13		2						-1	0		0				1	0			0								1		1	0						0											0
Nagubadi, Rao V. and Daowei Zhang	2005	12		1								-1	0				1	0			0								0			0						1		0									0
Nagubadi, Rao V. and Daowei Zhang	2010	15		1								-1	0				1	0			0								1		1	0						0											0
Plantinga and Mauldin	2001MA	25		1	0								0				1	0			0								0			0						0											0
Plantinga and Mauldin	2001SC	25		1	0								0				1	0			0								0			0						0											0
Plantinga and Mauldin	2001WI	25		1	0								0				1	0			0								0			0						0											0
Polyakov, Maksym; and Daowei Zhang	2008	27		0									0				0				0								0			0						0											0
Polyakov, Maksym Zhang, Daowei	2007	26		1			-1						0				0	0			0								1		1	2		-1	-1			0											0
Wear, David N. and Paul Bolstad	1998b	16		0									0				0				0								0			0						0											0
Zhang, Daowei and Rao V. Nagubadi	2005All-timber	17		1								-1	0				1	0			0								1		1	0						0											1
[truncated: 73 more columns]

## Sheet: F2A VOTE COUNT OBS
Descriptive Text			Intercept	FOREST RENT									FOREST COST/UNCERTAINTY				AGRICULTURE RENTS				AGRICULTURE COSTS / UNCERTAINTY								URBAN RENTS			URBAN COSTS / UNCERTAINTY						FOREST INCENTIVE PROGRAMS
Author(s)	Year	Reference number	Intercept	Number of models factor appears	Soil Expectation Value, All Sawtimber ($/acre)	Soil Expectation Value, All Pulpwood ($/acre)	Timber Products Income ($/county)	Forestry to Crop Rent (ratio)	Pulpwood Stumpage Price, Softwood ($/CD)	Sawtimber Stumpage Price Softwoods ($/MBF)	Sawtimber Stumpage Oak ($/MBF)	Sawtimber Stumpage Sawtimber, All ($/MBF)	Number of models factor appears	Timber Site Prep / Planting Costs ($/acre)	Trend in timber returns	Uncertainty of Timber Revenue (derived estimate)	Number of models factor appears	Annual County Farm Product Revenue, Total or Net ($/county or $/acre)	(SEV) ($/acre) (may	Farm Income to State Per Capita Income (ratio)	Number of models factor appears	County (or Parcel) Crop Costs ($/acre)	Conservation Practices Used on Plot (binary)	Conversion Costs Forest to Agriculture ($)	Property Taxes ($)	Trend in Agriculture Revenue (% change)	Irrigation (binary)	Uncertainty of Agriculture Revenue (derived estimate)	Number of models factor appears	Residential Land Value ($/acre)	Profit from Recently Developed Land / New Housing Units($/county)	Number of models factor appears	County Farmland Value ($/acre)	Conversion Cost Forest to Urban ($)	Property Taxes ($)	Sewer nearby (binary)	County variance of new housing value	Number of models factor appears	County Tree Planting, Other Conservation Program Expenditures ($)	County Tree Planting Programs (acres)	State has C/S Program for Forestry (binary)	County Rental Rate for WRP or CRP or Other Agriculture Reduction Programs ($/acre)	County WRP Restoration Costs ($/acre)	County Land in Acreage Adjustment Programs, Other Than WRP (%)	County Idle Crop Land (%)	Parcel (Plot) Has CRP Eligibility (binary)	Impact of Flood Control Program on Farming Feasibility (index)	Flood Control Programs Impact on Land Quality Heterogeneity (mean)	Impact of Flood Control Programs of Land Quality Heterogeneity Mean (index)
			POS	14	0	0	0	0	0	0	0	0	1	0	0	1	17	7	7	1	5	0	1	0	0	0	1	1	0	0	0	0	0	0	0	0	0	8	0	0	0	0	1	0	1	0	0	1	1
			NEG		8	1	3	0	0	1	0	0		0	0	0		0	0	0		2	0	2	1	0	0	0		0	0		0	0	0	0	0		2	1	0	2	0	0	0	2	2	0	0
			NS		2	0	0	0	0	0	0	0		0	1	0		2	0	0		1	0	0	0	1	0	0		0	0		0	0	0	0	0		0	0	0	0	0	1	0	0	0	0	0
Ahn, SoEun, Andrew J. Plantinga, and Ralph J. Alig	2000a	18	1	1	-1								0				1		1		0								0			0						0
Ahn, SoEun, Andrew J. Plantinga, and Ralph J. Alig	2001a	19	1	2	-1	-1							0				1	1			0								0			0						0
Ahn, SoEun, Andrew J. Plantinga, and Ralph J. Alig	2002a	20	1	1	-1								0				1		1		0								0			0						0
Claassen, Roger L.	1993b	1		1			-1						0				1	1			2	-1		-1					0			0						1									-1
Jensen, Jeff	2007	2	-1	0									0				1	0			0								0			0						2		-1				0
Lubowski, Reuben N.	2002a	21		1			-1						0				1	1			0								0			0						0
Mauldin, Thomas E., Andrew J. Plantinga, and Ralph Alig	1999a	22	0	1	0								0				1		1		0								0			0						0
Mauldin, Thomas E., Andrew J. Plantinga, and Ralph J. Alig	1999b	23	0	1	0								0				1	1			0								0			0						0
Munn, Ian A. and David Cleaves	1999a	24	0	0									0				0				0								0			0						0
Parks, Peter J. and Randall A. Kramer	1995	3	-1	0									0				1	1			1	0							0			0						5	-1			-1	1		1	-1
Parks, Peter J. and James P. Schorr	1997	4		0									0				1	0			1	-1							0			0						2				-1				-1
Plantinga, Andrew J., and SoEun Ahn.	2002	37	1	1	-1								0				1		1		0								0			0						0
Plamtinga, Andrew J. and Mauldin, Thomas E.	2001MA	25		1	-1								0				1		1		0								0			0						0
Plamtinga, Andrew J. and Mauldin, Thomas E.	2001SC	25		1	-1								0				1		1		0								0			0						0
Plamtinga, Andrew J. and Mauldin, Thomas E.	2001WI	25		1	-1								0				1		1		0								0			0						0
Poe, Gregory L.	1998	5		0									0				0				0								0			0						2
Polyakov, Maksym; and Daowei Zhang	2007	26		1			-1						0				1	1			2			-1	-1				0			0						0
Polyakov, Maksym; and Daowei Zhang	2008g	27		0									0				0				0								0			0						0
Schatzki, S. Todd	2003	6	-1	1	-1								2		0	1	1	1			4		1			0	1	1	0			0						1									-1
Stavins, Robert N. and Adam B. Jaffe	1990	7		0									0				0				0								0			0						2										1	1
White, F.C. and F.N. Fleming	1980a	8	1	1						-1			0				1			1	0								0			0						1	-1
[truncated: 75 more columns]

## Sheet:  U2D VOTE COUNT OBS
Descriptive Text			Intercept	FOREST RENT									FOREST COST/UNCERTAINTY				AGRICULTURE RENTS				AGRICULTURE COSTS / UNCERTAINTY								URBAN RENTS			URBAN COSTS / UNCERTAINTY						FOREST INCENTIVE PROGRAMS											ZONING ISSUES AFFECTING FORESTLAND LOSS
Author(s)	Year	Reference Number	Intercept	Number of models factor appears	Soil Expectation Value, All Sawtimber ($/acre)	Soil Expectation Value, All Pulpwood ($/acre)	Timber Products Income ($/county)	Forestry to Crop Rent (ratio)	Pulpwood Stumpage Price, Softwood ($/CD)	Sawtimber Stumpage Price Softwoods ($/MBF)	Sawtimber Stumpage Oak ($/MBF)	Sawtimber Stumpage Sawtimber, All ($/MBF)	Number of models factor appears	Timber Site Prep / Planting Costs ($/acre)	Trend in timber returns	Uncertainty of Timber Revenue (derived estimate)	Number of models factor appears	Annual County Farm Product Revenue, Total or Net ($/county or $/acre)	(SEV) ($/acre) (may	Farm Income to State Per Capita Income (ratio)	Number of models factor appears	County (or Parcel) Crop Costs ($/acre)	Conservation Practices Used on Plot (binary)	Conversion Costs Forest to Agriculture ($)	Property Taxes ($)	Trend in Agriculture Revenue (% change)	Irrigation (binary)	Uncertainty of Agriculture Revenue (derived estimate)	Number of models factor appears	Residential Land Value ($/acre)	Profit from Recently Developed Land / New Housing Units($/county)	Number of models factor appears	County Farmland Value ($/acre)	Conversion Cost Forest to Urban ($)	Property Taxes ($)	Sewer nearby (binary)	County variance of new housing value	Number of models factor appears	County Tree Planting, Other Conservation Program Expenditures ($)	County Tree Planting Programs (acres)	State has C/S Program for Forestry (binary)	County Rental Rate for WRP or CRP or Other Agriculture Reduction Programs ($/acre)	County WRP Restoration Costs ($/acre)	County Land in Acreage Adjustment Programs, Other Than WRP (%)	County Idle Crop Land (%)	Parcel (Plot) Has CRP Eligibility (binary)	Impact of Flood Control Program on Farming Feasibility (index)	Flood Control Programs Impact on Land Quality Heterogeneity (mean)	Number of models factor appears
			POS Votes	1	0	0	0	0	0	0	0	0	0	0	0	0	3	0	0	0	1	0	0	0	0	0	0	0	2	1	1	3	0	0	0	1	0	0	0	0	0	0	0	0	0	0	0	0	5
			NEG Votes		0	0	0	0	0	0	0	0		0	0	0		2	0	0		0	0	0	0	0	0	1		0	0		2	1	0	0	1		0	0	0	0	0	0	0	0	0	0
			NS Votes		0	0	0	0	0	1	0	0		0	0	0		1	0	0		0	0	0	0	0	0	0		0	0		0	0	0	0	0		0	0	0	0	0	0	0	0	0	0
Alig, Ralph; Jeffrey D. Kline and Mark Lichtenstein	2004	38		0									0				1	-1			0								0			0						0											0
Alig, Ralph J., David J. Lewis and Jennifer J. Swanson	2005a	39	1	0									0				0				0								0			0						0											0
Bockstael, Nancy E.	1996	40	-1	0									0				0				0								1	1		3	-1	-1		1		0											0
Carrion and Irwin	2004	41		0									0				0				0								0			0						0											1
Cho, Seong-Hoon; Junlie Wu; and Ralph Alig	2005	42		0									0				1	-1			1							-1	1		1	1					-1	0											4
Hsieh, Wen-hua, Elena G. Irwin, and Lynn Forster	2000	43	0	0									0				0				0								0			1	-1					0											0
Irwin, Elena G.; Hsieh, Wen-hua ; and Lawrence W. Libby	2002	44	1	0									0				0				0								0			0						0											4
Irwin, Elena G. and Nancy E. Bockstael	2002	45		0									0				0				0								0			0						0											2
Kline, Jeffrey D. and Ralph J. Alig	1999c	46	-1	1						0			0				1	0			0								0			0						0											5
Landis, John Landis and Ming Zhang	1997	47		0									0				0				0								0			0						0											0
[truncated: 73 more columns]

## Sheet:  F2NF VOTE COUNT OBS
Descriptive Text			Intercept	FOREST RENT									FOREST COST/UNCERTAINTY				AGRICULTURE RENTS				AGRICULTURE COSTS / UNCERTAINTY								URBAN RENTS			URBAN COSTS / UNCERTAINTY						FOREST INCENTIVE PROGRAMS											ZONING ISSUES AFFECTING FORESTLAND LOSS
Author(s)	Year	Reference number	Intercept	Number of models factor appears	Soil Expectation Value, All Sawtimber ($/acre)	Soil Expectation Value, All Pulpwood ($/acre)	Timber Products Income ($/county)	Forestry to Crop Rent (ratio)	Pulpwood Stumpage Price, Softwood ($/CD)	Sawtimber Stumpage Price Softwoods ($/MBF)	Sawtimber Stumpage Oak ($/MBF)	Sawtimber Stumpage Sawtimber, All ($/MBF)	Number of models factor appears	Timber Site Prep / Planting Costs ($/acre)	Trend in timber returns	Uncertainty of Timber Revenue (derived estimate)	Number of models factor appears	Annual County Farm Product Revenue, Total or Net ($/county or $/acre)	(SEV) ($/acre) (may	Farm Income to State Per Capita Income (ratio)	Number of models factor appears	County (or Parcel) Crop Costs ($/acre)	Conservation Practices Used on Plot (binary)	Conversion Costs Forest to Agriculture ($)	Property Taxes ($)	Trend in Agriculture Revenue (% change)	Irrigation (binary)	Uncertainty of Agriculture Revenue (derived estimate)	Number of models factor appears	Residential Land Value ($/acre)	Profit from Recently Developed Land / New Housing Units($/county)	Number of models factor appears	County Farmland Value ($/acre)	Conversion Cost Forest to Urban ($)	Property Taxes ($)	Sewer nearby (binary)	County variance of new housing value	Number of models factor appears	County Tree Planting, Other Conservation Program Expenditures ($)	County Tree Planting Programs (acres)	State has C/S Program for Forestry (binary)	County Rental Rate for WRP or CRP or Other Agriculture Reduction Programs ($/acre)	County WRP Restoration Costs ($/acre)	County Land in Acreage Adjustment Programs, Other Than WRP (%)	County Idle Crop Land (%)	Parcel (Plot) Has CRP Eligibility (binary)	Impact of Flood Control Program on Farming Feasibility (index)	Flood Control Programs Impact on Land Quality Heterogeneity (mean)	Number of models factor appears
			POS Votes	11	1	0	0	1	1	0	0	0	2	1	0	0	4	1	2	0	1	0	0	0	0	0	0	0	2	0	2	1	0	0	0	0	0	2	0	0	0	0	0	0	0	0	0	0	0
			NEG Votes		2	0	1	0	0	1	0	1		0	0	0		0	0	0		0	0	0	0	0	0	0		0	0		0	0	0	0	0		2	0	0	0	0	0	0	0	0	0
			NS Votes		1	0	2	2	0	1	0	0		1	0	0		1	0	0		1	0	0	0	0	0	0		0	0		1	0	0	0	0		0	0	0	0	0	0	0	0	0	0
Alig, Ralph J.	1986	29	1	1				0					0				0				0								0			0						0											0
Alig, Ralph, J., Fred C. White, and Brian C. Murray	1988 CP	28	-1	2			0	0					0				0				0								0			0						1	-1										0
Alig, Ralph, J., Fred C. White, and Brian C. Murray	1988 INT HL	28		2			0	1					0				0				0								0			0						1	-1										0
Hardie, Ian and Peter Parks	1997	30		2					1	0			1	0			1	0			1	0							0			0						0											0
Hardie, Ian, Peter Parks, Peter Gottlieb, and David Wear	2000c	31		1						-1			1	1			0				0								1		1	1	0					0											0
Lewis, David A. and Andrew J. Plantinga	2007b	32	-1	1			-1						0				0				0								1		1	0						0											0
Meng, Li	2011	33		1								-1	0				0				0								0			0						0											0
Parks, J and Murray, Brian C.	1994 WA	34		1	-1								0				1	1			0								0			0						0											0
Parks, J and Murray, Brian C.	1994 OR	34		1	0								0				0				0								0			0						0											0
Plantinga, Andrew J., and SoEun Ahn.	2002	37		1	1								0				1		1		0								0			0						0											0
Plantinga, Andrew J., and Junjie Wu	2003	35	0	1	-1								0				1		1		0								0			0						0											0
Wear, David N., Rei Liu, Michael Foreman, and Raymond Sheffield	1998	36	0	0									0				0				0								0			0						0											0
[truncated: 73 more columns]
